# Supplementary material for: Near-infrared-responsive Prussian blue nanocages loaded with 5-fluorouracil for combined chemotherapy and photothermal therapy in tumor treatment
Source: Royal Society of Chemistry journal article supplement (doi:10.1039/d4ra04609a), 2024-01-01
Supplement: d4ra04609a1.pdf [file d4ra04609a1.pdf]

## Supplementary Materials

### Near-infrared-responsive Prussian blue nanocages loaded with 5-fluorouracil for combined chemotherapy and photothermal therapy in tumor treatment

Zhongyi Guo, Kang Fu, Jingyi Sun, Wenhao Du, Qisheng Hao and Xiao Hu \*

Department of Hepatobiliary and Pancreatic Surgery, the Affiliated Hospital of Qingdao University, Qingdao, Shandong, 26000, P. R. China  
E-mail: drhuxiao202@163.com

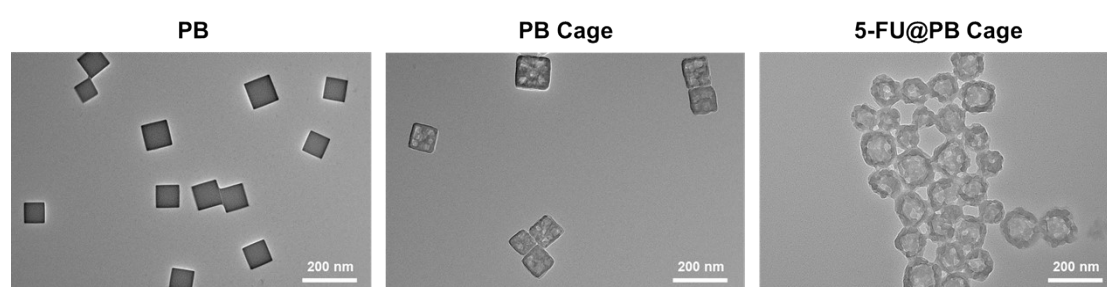

Fig. S1 The low-resolution TEM images of PB, PB Cage and 5-FU@PB Cage.

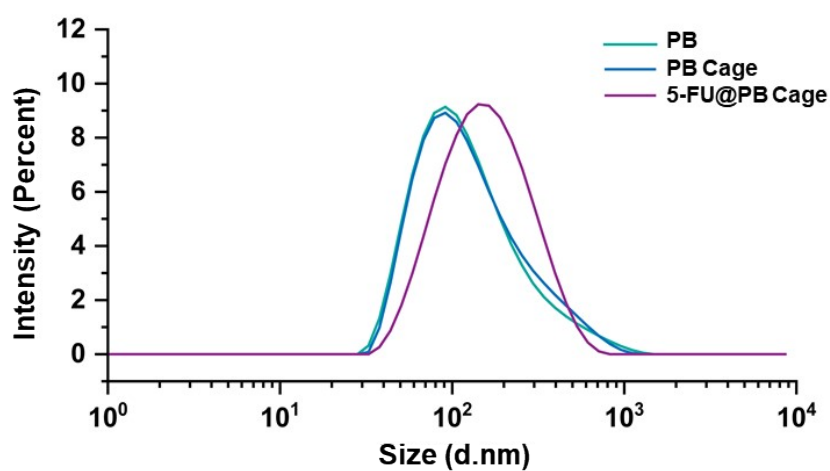

Fig. S2 The size distribution of PB, PB Cage and 5-FU@PB Cage.

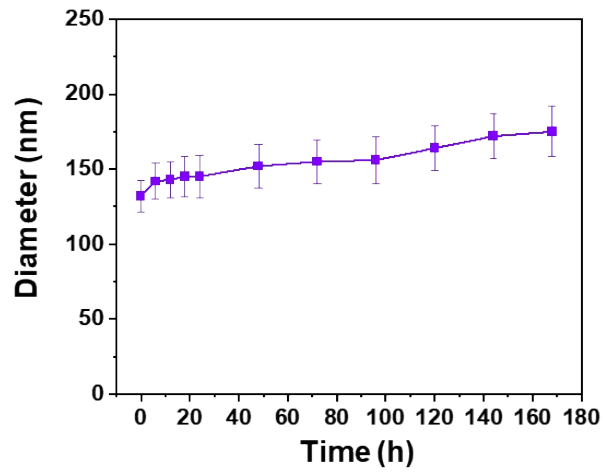

Fig. S3 The particle size stability of 5-FU@PB Cage in serum.

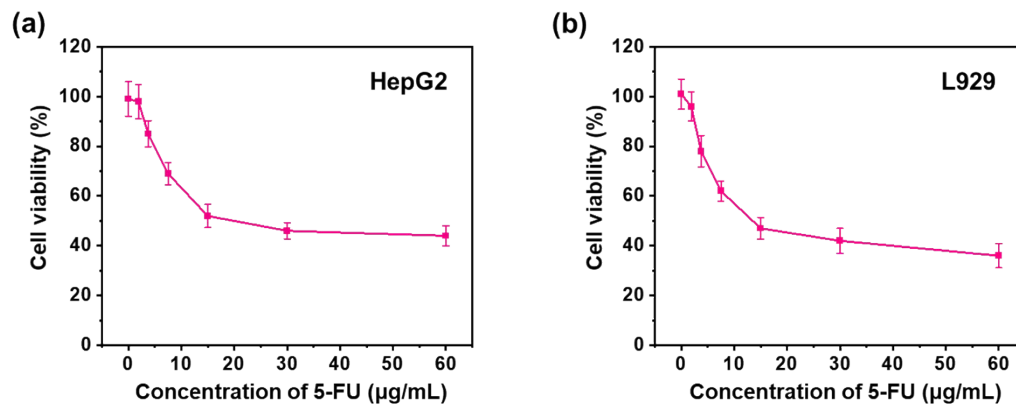

Fig. S4 The cell viability of the HepG2 and L929 cells served with different concentrations of 5-FU (mean  $\pm$  SD, n=6).
